# Supplementary material for: Acute kidney injury after cardiac surgery is associated with platelet activation
Source: bioRxiv or medRxiv preprint supplement (doi:10.1101/2023.10.10.23296815), 2024-08-20
Supplement: Supplementary file [file media-1.pdf]

Figure S1

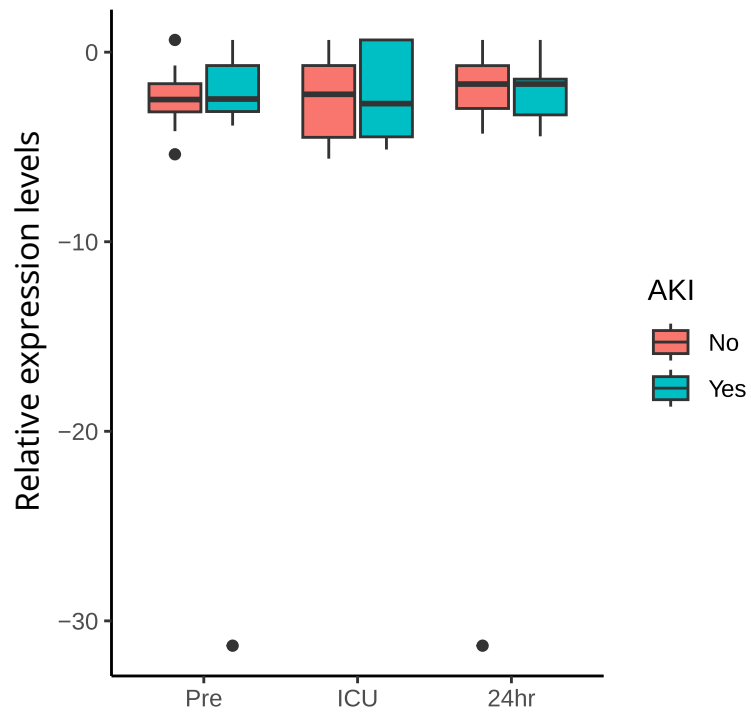

**Figure S1** - Boxplots of control miRNA used to normalise data across experiments. The values are processed sequencing reads, as described in the Methods section..

**Table 1** – Summary of statistical analysis of all variables in the full dataset. Tests between groups were conducted by t-test or non-parametric Kruskal–Wallis test for continuous variables. Data are presented as mean (standard deviation, STD) or median (interquartile range) for continuous variables. Significant values are given in red.

| Type                | Variable              | Time   | Normal distribution | AKI                      | non-AKI                  | p.value |
|---------------------|-----------------------|--------|---------------------|--------------------------|--------------------------|---------|
| AKI biomarkers      | SCr                   | pre    | No                  | 85 (73-104.75)           | 88 (73-103)              | 0.848   |
| AKI biomarkers      | SCr                   | icu    | No                  | 96 (82.25-112.75)        | 92 (76-108)              | 0.172   |
| AKI biomarkers      | SCr                   | 6-12hr | No                  | 113 (99-130)             | 96 (82-115)              | 0.001   |
| AKI biomarkers      | SCr                   | 24hr   | No                  | 122 (99.75-153.5)        | 96 (76-113)              | <0.001  |
| AKI biomarkers      | SCr                   | 48hr   | No                  | 132 (110-160)            | 91 (77.5-111)            | <0.001  |
| AKI biomarkers      | SCr                   | 72hr   | No                  | 116 (96-142.25)          | 90.5 (78.75-109.5)       | <0.001  |
| AKI biomarkers      | SCr                   | 96hr   | No                  | 111 (96-142.5)           | 85.5 (76-97.25)          | <0.001  |
| EV analysis         | Annexin V             | pre    | No                  | 10.348 (5.516-25.045)    | 8.198 (4.853-14.263)     | 0.263   |
| EV analysis         | Annexin V             | icu    | No                  | 11.521 (7.352-17.58)     | 11.508 (6.367-19.875)    | 0.771   |
| EV analysis         | Annexin V             | 6-12hr | No                  | 10.765 (4.69-16.372)     | 10.343 (5.889-18.661)    | 0.504   |
| EV analysis         | Annexin V             | 24hr   | No                  | 12.052 (8.602-22.61)     | 13.144 (4.198-21.769)    | 0.355   |
| EV analysis         | Annexin V             | 48hr   | No                  | 10.809 (4.114-18.435)    | 12.088 (6.875-18.915)    | 0.489   |
| EV analysis         | CD14 (monocytes)      | pre    | No                  | 2.375 (0.89-5.362)       | 2.05 (0.785-5.94)        | 0.769   |
| EV analysis         | CD14 (monocytes)      | icu    | No                  | 1.805 (0.697-5.075)      | 3.14 (1.24-5.03)         | 0.242   |
| EV analysis         | CD14 (monocytes)      | 6-12hr | No                  | 1.66 (0.54-5.18)         | 1.78 (0.968-4.718)       | 0.297   |
| EV analysis         | CD14 (monocytes)      | 24hr   | No                  | 2.11 (0.767-4.29)        | 3.245 (0.965-5.707)      | 0.242   |
| EV analysis         | CD14 (monocytes)      | 48hr   | No                  | 2.21 (0.812-4.865)       | 1.73 (0.815-4.11)        | 0.698   |
| EV analysis         | CD142 (tissue factor) | pre    | No                  | 7.21 (2.458-15.31)       | 5.77 (2.685-25.245)      | 0.687   |
| EV analysis         | CD142 (tissue factor) | icu    | No                  | 5.905 (1.96-13.805)      | 8.45 (5.21-14.97)        | 0.127   |
| EV analysis         | CD142 (tissue factor) | 6-12hr | No                  | 5.705 (1.97-9.82)        | 7.875 (4.18-12.948)      | 0.1     |
| EV analysis         | CD142 (tissue factor) | 24hr   | No                  | 4.72 (2.16-11.93)        | 10.08 (3.643-19.898)     | 0.194   |
| EV analysis         | CD142 (tissue factor) | 48hr   | No                  | 5 (2.035-15.682)         | 6.32 (3.16-8.8)          | 0.724   |
| EV analysis         | CD144 (endothelial)   | pre    | No                  | 3.48 (1.785-8.56)        | 2.865 (1.343-4.902)      | 0.301   |
| EV analysis         | CD144 (endothelial)   | icu    | No                  | 4.64 (2.085-12.79)       | 4.86 (2.66-13.42)        | 0.809   |
| EV analysis         | CD144 (endothelial)   | 6-12hr | No                  | 3.56 (2.04-7.95)         | 6.285 (2.77-10.485)      | 0.108   |
| EV analysis         | CD144 (endothelial)   | 24hr   | No                  | 5.27 (2.09-9.37)         | 5.71 (3.308-8.422)       | 0.723   |
| EV analysis         | CD144 (endothelial)   | 48hr   | No                  | 2.91 (1.21-6.293)        | 3.65 (2.105-6.87)        | 0.319   |
| EV analysis         | CD16 (granulocytes)   | pre    | No                  | 3.64 (1.878-5.648)       | 2.49 (1.4-4.217)         | 0.186   |
| EV analysis         | CD16 (granulocytes)   | icu    | No                  | 4.21 (2.57-7.232)        | 3.76 (2.32-5.4)          | 0.638   |
| EV analysis         | CD16 (granulocytes)   | 6-12hr | No                  | 4.77 (2.23-6.6)          | 4.445 (2.475-7.033)      | 0.702   |
| EV analysis         | CD16 (granulocytes)   | 24hr   | No                  | 5.55 (2.62-7.54)         | 4.285 (2.378-5.97)       | 0.361   |
| EV analysis         | CD16 (granulocytes)   | 48hr   | No                  | 6.245 (3.6-8.025)        | 4.72 (3.26-6.35)         | 0.132   |
| EV analysis         | CD235a (red cells)    | pre    | No                  | 3.47 (1.208-10.887)      | 2.645 (0.945-8.25)       | 0.418   |
| EV analysis         | CD235a (red cells)    | icu    | No                  | 2.35 (0.915-8.76)        | 3.71 (1.92-6.1)          | 0.554   |
| EV analysis         | CD235a (red cells)    | 6-12hr | No                  | 1.43 (0.61-4.61)         | 3.115 (1.092-7.067)      | 0.11    |
| EV analysis         | CD235a (red cells)    | 24hr   | No                  | 1.94 (0.82-4.47)         | 1.865 (0.627-5.352)      | 0.819   |
| EV analysis         | CD235a (red cells)    | 48hr   | No                  | 1.71 (0.597-5.092)       | 2.05 (1.18-6.66)         | 0.483   |
| EV analysis         | CD284 (myeloid cells) | pre    | No                  | 14.24 (8.02-24.81)       | 13.525 (7.902-29.665)    | 0.856   |
| EV analysis         | CD284 (myeloid cells) | icu    | No                  | 15.88 (4.47-25.787)      | 14.51 (7.39-28.38)       | 0.733   |
| EV analysis         | CD284 (myeloid cells) | 6-12hr | No                  | 11.14 (7.47-17.92)       | 15.87 (7.01-26.64)       | 0.371   |
| EV analysis         | CD284 (myeloid cells) | 24hr   | No                  | 13.4 (5.1-31.51)         | 12.865 (5.295-21.247)    | 0.623   |
| EV analysis         | CD284 (myeloid cells) | 48hr   | No                  | 10.795 (4.192-22.282)    | 8.77 (4.46-15.56)        | 0.5     |
| EV analysis         | CD3 (T-cells)         | pre    | No                  | 5.93 (3.143-13.482)      | 7.135 (4.33-16.29)       | 0.259   |
| EV analysis         | CD3 (T-cells)         | icu    | No                  | 6.46 (3.267-12.688)      | 7.88 (6.19-12.63)        | 0.236   |
| EV analysis         | CD3 (T-cells)         | 6-12hr | No                  | 6.3 (3.74-10.19)         | 7.8 (5.355-14.19)        | 0.055   |
| EV analysis         | CD3 (T-cells)         | 24hr   | No                  | 9.07 (5.32-14.613)       | 8.48 (5.96-11.453)       | 0.423   |
| EV analysis         | CD3 (T-cells)         | 48hr   | No                  | 9.66 (4.093-22.778)      | 6.88 (5.225-11.11)       | 0.148   |
| EV analysis         | CD41 (platelets)      | pre    | No                  | 0.255 (0.078-0.635)      | 0.13 (0.038-0.252)       | 0.05    |
| EV analysis         | CD41 (platelets)      | icu    | No                  | 0.155 (0.062-0.483)      | 0.08 (0.04-0.2)          | 0.128   |
| EV analysis         | CD41 (platelets)      | 6-12hr | No                  | 0.09 (0.03-0.45)         | 0.06 (0.032-0.305)       | 0.769   |
| EV analysis         | CD41 (platelets)      | 24hr   | No                  | 0.095 (0.05-0.185)       | 0.05 (0.02-0.18)         | 0.028   |
| EV analysis         | CD41 (platelets)      | 48hr   | No                  | 0.065 (0.022-0.242)      | 0.05 (0.025-0.295)       | 0.986   |
| EV analysis         | CD62E (endothelial)   | pre    | No                  | 2.46 (1.088-6.087)       | 2.425 (1.55-4.64)        | 0.41    |
| EV analysis         | CD62E (endothelial)   | icu    | No                  | 2.635 (1.032-5.715)      | 3.27 (1.77-5.12)         | 0.617   |
| EV analysis         | CD62E (endothelial)   | 6-12hr | No                  | 2.7 (0.82-4.77)          | 3.15 (1.885-6.738)       | 0.176   |
| EV analysis         | CD62E (endothelial)   | 24hr   | No                  | 4.085 (1.302-6.535)      | 3.045 (1.24-4.452)       | 0.182   |
| EV analysis         | CD62E (endothelial)   | 48hr   | No                  | 3.51 (1.765-5.535)       | 3.79 (1.56-4.665)        | 0.453   |
| EV analysis         | MV concentration      | pre    | No                  | 9.197 (4.887-22.753)     | 14.455 (5.036-20.823)    | 0.916   |
| EV analysis         | MV concentration      | icu    | No                  | 11.915 (6.937-15.312)    | 8.585 (6.281-15.496)     | 0.225   |
| EV analysis         | MV concentration      | 6-12hr | No                  | 8.262 (2.955-17.048)     | 5.952 (2.714-13.603)     | 0.414   |
| EV analysis         | MV concentration      | 24hr   | No                  | 5.458 (2.999-10.675)     | 5.697 (2.784-10.822)     | 0.806   |
| EV analysis         | MV concentration      | 48hr   | No                  | 7.137 (3.987-15.998)     | 6.323 (3.405-10.257)     | 0.179   |
| miRNA               | hsa-miR-1262          | pre    | No                  | 8.281 (0-1986.495)       | 1 (0-6714.537)           | 0.566   |
| miRNA               | hsa-miR-1262          | icu    | No                  | 28.677 (0.241-26293.808) | 0 (0-4.311)              | 0.005   |
| miRNA               | hsa-miR-1262          | 24hr   | No                  | 8.006 (0-2846.239)       | 0 (0-88.788)             | 0.106   |
| miRNA               | hsa-miR-133b          | pre    | No                  | 0.694 (0.021-22.034)     | 31.481 (0.126-61660.576) | 0.01    |
| miRNA               | hsa-miR-133b          | icu    | No                  | 26.371 (0.72-3860.3)     | 351.216 (2.716-2709.37)  | 0.541   |
| miRNA               | hsa-miR-133b          | 24hr   | No                  | 165.899 (2.676-3099.212) | 113.148 (0.846-2516.746) | 0.767   |
| miRNA               | hsa-miR-920           | pre    | No                  | 0 (0-0)                  | 0 (0-0.002)              | 0.056   |
| miRNA               | hsa-miR-920           | icu    | No                  | 0 (0-0)                  | 0 (0-0)                  | 0.463   |
| miRNA               | hsa-miR-920           | 24hr   | No                  | 0 (0-0)                  | 0 (0-0)                  | 0.813   |
| miRNA               | hsa-miR-92a-1         | pre    | No                  | 0.009 (0-0.758)          | 0.004 (0-1)              | 0.733   |
| miRNA               | hsa-miR-92a-1         | icu    | No                  | 0.836 (0.008-9.821)      | 0.007 (0-5.022)          | 0.201   |
| miRNA               | hsa-miR-92a-1         | 24hr   | No                  | 0.785 (0-8.602)          | 0 (0-1)                  | 0.064   |
| Multiplate analysis | ADP                   | pre    | Yes                 | 703.615 (279.448)        | 779.026 (262.799)        | 0.194   |
| Multiplate analysis | ADP                   | icu    | No                  | 457 (277-696)            | 659.5 (385.75-1031.75)   | 0.064   |
| Multiplate analysis | ADP                   | 6-12hr | Yes                 | 610.113 (301.135)        | 797.000 (292.303)        | 0.003   |
| Multiplate analysis | ADP                   | 24hr   | No                  | 505.5 (359.75-780)       | 559 (473-840)            | 0.213   |
| Multiplate analysis | ADP                   | 48hr   | No                  | 441 (327-574)            | 413 (337.5-668)          | 0.457   |
| Multiplate analysis | ASPI                  | pre    | No                  | 493 (176-786)            | 311.5 (178.25-671.25)    | 0.312   |
| Multiplate analysis | ASPI                  | icu    | No                  | 379 (145-688)            | 296.5 (173.75-599.25)    | 0.938   |
| Multiplate analysis | ASPI                  | 6-12hr | No                  | 445 (200-729)            | 374 (275.5-704.25)       | 0.822   |
| Multiplate analysis | ASPI                  | 24hr   | No                  | 370.5 (233-597.5)        | 367 (249-604.5)          | 0.837   |
| Multiplate analysis | ASPI                  | 48hr   | No                  | 267 (170-443)            | 270 (192.5-456)          | 0.663   |
| Multiplate analysis | TRAP                  | pre    | Yes                 | 1168.962 (354.421)       | 1227.921 (300.653)       | 0.397   |
| Multiplate analysis | TRAP                  | icu    | Yes                 | 1052.849 (526.757)       | 1162.95 (433.772)        | 0.272   |
| Multiplate analysis | TRAP                  | 6-12hr | Yes                 | 1211.396 (406.153)       | 1342.4 (316.585)         | 0.084   |

|                         |                              |        |     |                                      |                                      |       |
|-------------------------|------------------------------|--------|-----|--------------------------------------|--------------------------------------|-------|
| Multiplate analysis     | TRAP                         | 24hr   | Yes | 949.926 340.307732648069             | 947.816 (373.635)                    | 0.978 |
| Multiplate analysis     | TRAP                         | 48hr   | No  | 750 (572-1005)                       | 700 (505-900.5)                      | 0.422 |
| Flow cytometry analysis | Activated GPIIb/IIIa (PAC-1) | pre    | Yes | 53.766 (28.359)                      | 57.142 (25.778)                      | 0.605 |
| Flow cytometry analysis | Activated GPIIb/IIIa (PAC-1) | icu    | No  | 41.4 (22.72-68)                      | 37.195 (24.587-62.09)                | 0.549 |
| Flow cytometry analysis | Activated GPIIb/IIIa (PAC-1) | 6-12hr | No  | 35.885 (18.65-60.427)                | 24.56 (13.65-44.435)                 | 0.043 |
| Flow cytometry analysis | Activated GPIIb/IIIa (PAC-1) | 24hr   | No  | 58.03 (32.03-80.318)                 | 45.695 (36.888-64.553)               | 0.433 |
| Flow cytometry analysis | Activated GPIIb/IIIa (PAC-1) | 48hr   | No  | 46.93 (32.525-84.398)                | 41.835 (31.363-66.2)                 | 0.398 |
| Flow cytometry analysis | CD11b                        | pre    | No  | 3.83 (0.76-12.015)                   | 2.28 (0.83-3.73)                     | 0.201 |
| Flow cytometry analysis | CD11b                        | icu    | No  | 8.28 (1.415-27.985)                  | 5.45 (0.472-21.317)                  | 0.372 |
| Flow cytometry analysis | CD11b                        | 6-12hr | No  | 4.36 (0.82-18.69)                    | 3.645 (0.855-9.88)                   | 0.787 |
| Flow cytometry analysis | CD11b                        | 24hr   | No  | 6.31 (1.84-14.69)                    | 2.38 (0.89-10.367)                   | 0.251 |
| Flow cytometry analysis | CD11b                        | 48hr   | No  | 3.84 (1.19-21.173)                   | 1.42 (0.66-3.94)                     | 0.357 |
| Flow cytometry analysis | CD14/CD41                    | pre    | No  | 7.245 (5.14-8.285)                   | 6.235 (4.784-7.755)                  | 0.294 |
| Flow cytometry analysis | CD14/CD41                    | icu    | No  | 4.269 (2.783-5.969)                  | 3.33 (1.035-5.895)                   | 0.302 |
| Flow cytometry analysis | CD14/CD41                    | 6-12hr | No  | 7.875 (2.829-14.554)                 | 6.67 (1.376-11.7)                    | 0.301 |
| Flow cytometry analysis | CD14/CD41                    | 24hr   | No  | 7.38 (3.74-13.081)                   | 4.7 (2.455-9.385)                    | 0.201 |
| Flow cytometry analysis | CD14/CD41                    | 48hr   | No  | 7.52 (2.327-10.803)                  | 6.013 (2.596-11.314)                 | 0.971 |
| Flow cytometry analysis | CD16/CD41                    | pre    | No  | 37.41 (16.993-53.438)                | 13.304 (2.419-39.443)                | 0.009 |
| Flow cytometry analysis | CD16/CD41                    | icu    | No  | 19.682 (5.096-43.63)                 | 8.182 (1.396-26.928)                 | 0.133 |
| Flow cytometry analysis | CD16/CD41                    | 6-12hr | No  | 17.158 (6.192-46.396)                | 5.823 (1.204-14.831)                 | 0.006 |
| Flow cytometry analysis | CD16/CD41                    | 24hr   | No  | 29.968 (13.244-48.674)               | 11.357 (1.816-26.631)                | 0.019 |
| Flow cytometry analysis | CD16/CD41                    | 48hr   | No  | 30.452 (16.14-48.169)                | 17.124 (3.477-38.01)                 | 0.075 |
| Flow cytometry analysis | CD41/CD62P                   | pre    | No  | 11.14 (7.87-20.16)                   | 11.77 (9.06-18.94)                   | 0.583 |
| Flow cytometry analysis | CD41/CD62P                   | icu    | No  | 10.86 (8.14-18.13)                   | 10.12 (5.51-14.675)                  | 0.393 |
| Flow cytometry analysis | CD41/CD62P                   | 6-12hr | No  | 10.07 (7.978-14.555)                 | 9.935 (6.522-13.608)                 | 0.572 |
| Flow cytometry analysis | CD41/CD62P                   | 24hr   | No  | 11.73 (7.387-15.41)                  | 9.82 (7.237-13.675)                  | 0.316 |
| Flow cytometry analysis | CD41/CD62P                   | 48hr   | No  | 12.34 (8.7-21.12)                    | 11.185 (5-16.415)                    | 0.259 |
| Flow cytometry analysis | CD64/CD163                   | pre    | No  | 7.476 (5.805-10.05)                  | 6.79 (5.543-8.937)                   | 0.378 |
| Flow cytometry analysis | CD64/CD163                   | icu    | No  | 8.75 (3.891-16.539)                  | 7.509 (1.975-12.405)                 | 0.308 |
| Flow cytometry analysis | CD64/CD163                   | 6-12hr | No  | 14.929 (6.672-28.555)                | 11.061 (5.195-27.611)                | 0.288 |
| Flow cytometry analysis | CD64/CD163                   | 24hr   | No  | 16.21 (7.499-28.39)                  | 7.509 (5.081-16.515)                 | 0.05  |
| Flow cytometry analysis | CD64/CD163                   | 48hr   | No  | 16.335 (7.939-30.59)                 | 8.913 (6.177-24.41)                  | 0.266 |
| Circulating biomarkers  | CXCL1                        | pre    | No  | 2.768 (2.318-10.4)                   | 3.199 (2.318-6.65)                   | 0.341 |
| Circulating biomarkers  | CXCL1                        | icu    | No  | 12.119 (2.462-30.367)                | 6.679 (2.682-14.154)                 | 0.167 |
| Circulating biomarkers  | CXCL1                        | 6-12hr | No  | 6.085 (2.318-16.255)                 | 3.989 (2.318-9.676)                  | 0.338 |
| Circulating biomarkers  | CXCL1                        | 24hr   | No  | 3.898 (2.318-13.169)                 | 2.461 (2.318-6.826)                  | 0.32  |
| Circulating biomarkers  | CXCL1                        | 48hr   | No  | 3.136 (2.318-14.852)                 | 2.61 (2.318-7.86)                    | 0.661 |
| Circulating biomarkers  | ICAM1                        | pre    | No  | 1599162.035 (888565.143-2159956.672) | 1050797.044 (503857.618-1563558.9)   | 0.046 |
| Circulating biomarkers  | ICAM1                        | icu    | No  | 1513902.02 (696906.761-1998536.287)  | 1141869.135 (934889.756-1717702.125) | 0.261 |
| Circulating biomarkers  | ICAM1                        | 6-12hr | No  | 1491300.445 (911558.2-2225791.226)   | 1309041.26 (911398.265-2018495.947)  | 0.524 |
| Circulating biomarkers  | ICAM1                        | 24hr   | No  | 1679358.43 (939582.854-2518320.279)  | 1385257.45 (787516.012-1977158.473)  | 0.157 |
| Circulating biomarkers  | ICAM1                        | 48hr   | No  | 1948995.848 (1162919.005-3104333.25) | 1012597.923 (837179.132-1688613.032) | 0.002 |
| Circulating biomarkers  | IL10                         | pre    | No  | 0.355 (0.06-1.07)                    | 0.208 (0.06-0.937)                   | 0.561 |
| Circulating biomarkers  | IL10                         | icu    | No  | 23.377 (8.31-36.178)                 | 26.424 (10.154-59.832)               | 0.222 |
| Circulating biomarkers  | IL10                         | 6-12hr | No  | 8.146 (2.975-21.964)                 | 6.219 (2.32-16.935)                  | 0.528 |
| Circulating biomarkers  | IL10                         | 24hr   | No  | 3.085 (1.259-7.27)                   | 1.721 (0.3-6.29)                     | 0.172 |
| Circulating biomarkers  | IL10                         | 48hr   | No  | 1.311 (0.193-3.342)                  | 1.345 (0.06-3.7)                     | 0.745 |
| Circulating biomarkers  | IL6                          | pre    | No  | 0.52 (0.52-0.524)                    | 0.52 (0.52-0.52)                     | 0.581 |
| Circulating biomarkers  | IL6                          | icu    | No  | 53.786 (23.085-129.063)              | 49.056 (25.734-79.706)               | 0.535 |
| Circulating biomarkers  | IL6                          | 6-12hr | No  | 45.864 (20.607-82.747)               | 46.023 (23.639-60.262)               | 0.742 |
| Circulating biomarkers  | IL6                          | 24hr   | No  | 34.397 (11.97-59.674)                | 25.535 (13.926-45.318)               | 0.542 |
| Circulating biomarkers  | IL6                          | 48hr   | No  | 28.154 (11.699-62.629)               | 30.19 (14.471-74.294)                | 0.939 |
| Circulating biomarkers  | IL8                          | pre    | No  | 0.003 (0.003-0.826)                  | 0.003 (0.003-0.957)                  | 0.744 |
| Circulating biomarkers  | IL8                          | icu    | No  | 3.138 (1.529-7.707)                  | 4.662 (1.67-6.969)                   | 0.692 |
| Circulating biomarkers  | IL8                          | 6-12hr | No  | 3.492 (1.421-5.645)                  | 3.409 (1.794-5.447)                  | 0.939 |
| Circulating biomarkers  | IL8                          | 24hr   | No  | 2.082 (0.655-3.617)                  | 1.71 (0.425-3.757)                   | 0.709 |
| Circulating biomarkers  | IL8                          | 48hr   | No  | 1.848 (0.22-3.56)                    | 1.241 (0.238-2.709)                  | 0.438 |

**eTable 2** - Significantly different miRs - logFC - log fold change; AveExpr - average expression; t - t-statistics; P.Value - unadjusted p-value; adj.P.Val - Benjamini-Hochberd-adjusted p-value, B - B-statistics

| <b>Time</b> | <b>miRNA</b>    | <b>logFC</b> | <b>AveExpr</b> | <b>t</b> | <b>P.Value</b> | <b>adj.P.Val</b> | <b>B</b> |
|-------------|-----------------|--------------|----------------|----------|----------------|------------------|----------|
| pre         | has-miR-668     | -6.923       | -30.550        | -5.852   | <0.001         | <0.001           | 6.292    |
| ICU         | hsa-miR-518a-3p | 4.541        | -31.097        | 210.544  | <0.001         | <0.001           | 114.872  |
| ICU         | hsa-miR-133b    | 17.189       | -26.748        | 5.342    | <0.001         | 0.001            | 4.461    |
| ICU         | hsa-miR-92a     | 7.172        | -30.102        | 4.933    | <0.001         | 0.002            | 3.005    |
| ICU         | Hsa-miR-1262    | 9.919        | -8.115         | 4.487    | <0.001         | 0.007            | 1.583    |
| ICU         | Hsa-miR-920     | 6.052        | -30.279        | 3.942    | <0.001         | 0.034            | -0.210   |

eTable3

**eTable 3** – Summary of statistical analysis of all variables in patients receiving aspirin only. Tests between groups were conducted by t-test or non-parametric Kruskal-Wallis test for continuous variables. Data are presented as mean (standard deviation, STD) or median (interquartile range) for continuous variables. Significant values are given in red.

| Type                | Variable              | Time | Normal | AKI                         | non-AKI                  | p-value |
|---------------------|-----------------------|------|--------|-----------------------------|--------------------------|---------|
| AKI biomarkers      | Serum creatinine      | pre  | Yes    | 86.188 (19.42)              | 86.793 (22.823)          | 0.912   |
| AKI biomarkers      | Serum creatinine      | icu  | No     | 93 (80 - 103.75)            | 88 (76 - 101)            | 0.374   |
| AKI biomarkers      | Serum creatinine      | 6hr  | No     | 106 (96 - 123.5)            | 94.5 (82 - 113.75)       | 0.016   |
| AKI biomarkers      | Serum creatinine      | 24hr | No     | 114 (97 - 141)              | 100.5 (77.5 - 113)       | 0.003   |
| AKI biomarkers      | Serum creatinine      | 48hr | No     | 128.5 (106.25 - 142.5)      | 91 (83 - 111)            | 0.001   |
| AKI biomarkers      | Serum creatinine      | 72hr | No     | 114 (91.5 - 133.5)          | 91 (78 - 109)            | 0.018   |
| AKI biomarkers      | Serum creatinine      | 96hr | No     | 105.5 (89.5 - 131)          | 85.5 (77.25 - 97.75)     | 0.011   |
| EV analysis         | Annexin V             | pre  | No     | 11.828 (6.252 - 30.099)     | 9.666 (5.183 - 14.799)   | 0.201   |
| EV analysis         | Annexin V             | icu  | No     | 11.651 (8.997 - 19.112)     | 13.585 (6.044 - 22.033)  | 0.993   |
| EV analysis         | Annexin V             | 6hr  | No     | 11.135 (5.824 - 16.501)     | 11.255 (6.344 - 19.241)  | 0.636   |
| EV analysis         | Annexin V             | 24hr | No     | 15.241 (9.366 - 24.579)     | 11.471 (4.198 - 26.488)  | 0.216   |
| EV analysis         | Annexin V             | 48hr | No     | 9.477 (3.473 - 18.407)      | 12.088 (9.572 - 18.727)  | 0.279   |
| EV analysis         | CD14 (monocytes)      | pre  | No     | 3.98 (1.418 - 6.2)          | 2.34 (0.785 - 7.98)      | 0.946   |
| EV analysis         | CD14 (monocytes)      | icu  | No     | 1.92 (0.922 - 5.432)        | 3.06 (1.255 - 6.365)     | 0.506   |
| EV analysis         | CD14 (monocytes)      | 6hr  | No     | 1.76 (0.66 - 5.275)         | 2.215 (1.102 - 5.228)    | 0.329   |
| EV analysis         | CD14 (monocytes)      | 24hr | No     | 2.335 (0.845 - 5.44)        | 4.135 (1.465 - 5.905)    | 0.325   |
| EV analysis         | CD14 (monocytes)      | 48hr | No     | 2.65 (1.225 - 4.46)         | 2.16 (1.29 - 5.79)       | 0.941   |
| EV analysis         | CD142 (tissue factor) | pre  | No     | 10.49 (3.896 - 19.472)      | 12.27 (2.685 - 27.69)    | 0.759   |
| EV analysis         | CD142 (tissue factor) | icu  | No     | 8 (2.287 - 17.94)           | 7.86 (4.828 - 14.15)     | 0.755   |
| EV analysis         | CD142 (tissue factor) | 6hr  | No     | 8.24 (2.185 - 10.78)        | 7.875 (4.3 - 12.583)     | 0.337   |
| EV analysis         | CD142 (tissue factor) | 24hr | No     | 6.28 (2.435 - 16.005)       | 10.09 (4.715 - 20.123)   | 0.429   |
| EV analysis         | CD142 (tissue factor) | 48hr | No     | 7.06 (2.93 - 19.935)        | 6.58 (3.9 - 8.95)        | 0.612   |
| EV analysis         | CD144 (endothelial)   | pre  | No     | 6.61 (2.645 - 11.08)        | 2.975 (1.343 - 5.803)    | 0.148   |
| EV analysis         | CD144 (endothelial)   | icu  | No     | 5.62 (2.783 - 13.555)       | 4.245 (2.135 - 14.55)    | 0.736   |
| EV analysis         | CD144 (endothelial)   | 6hr  | No     | 3.79 (2.325 - 9.755)        | 6.94 (3.565 - 10.622)    | 0.255   |
| EV analysis         | CD144 (endothelial)   | 24hr | No     | 5.26 (2.208 - 10.375)       | 5.98 (3.433 - 8.745)     | 0.561   |
| EV analysis         | CD144 (endothelial)   | 48hr | No     | 2.77 (1.585 - 6.18)         | 3.7 (2.22 - 7.22)        | 0.226   |
| EV analysis         | CD16 (granulocytes)   | pre  | No     | 3.64 (2.056 - 5.663)        | 2.08 (1.298 - 3.848)     | 0.108   |
| EV analysis         | CD16 (granulocytes)   | icu  | No     | 4.41 (2.587 - 6.207)        | 3.005 (2.245 - 4.852)    | 0.073   |
| EV analysis         | CD16 (granulocytes)   | 6hr  | No     | 4.92 (2.265 - 6.625)        | 4.275 (2.725 - 6.365)    | 0.894   |
| EV analysis         | CD16 (granulocytes)   | 24hr | No     | 5.785 (3.788 - 7.883)       | 4.375 (2.378 - 6.62)     | 0.329   |
| EV analysis         | CD16 (granulocytes)   | 48hr | No     | 6.75 (4.165 - 9.355)        | 4.77 (2.45 - 6.64)       | 0.06    |
| EV analysis         | CD235a (red cells)    | pre  | No     | 5.295 (1.388 - 15.085)      | 2.8 (1.078 - 9.93)       | 0.159   |
| EV analysis         | CD235a (red cells)    | icu  | No     | 3.99 (1.85 - 9.41)          | 3.785 (1.622 - 5.897)    | 0.742   |
| EV analysis         | CD235a (red cells)    | 6hr  | No     | 2.11 (0.74 - 5.355)         | 2.79 (1.117 - 6.595)     | 0.499   |
| EV analysis         | CD235a (red cells)    | 24hr | No     | 2.345 (0.893 - 5.212)       | 2.375 (0.977 - 5.457)    | 0.994   |
| EV analysis         | CD235a (red cells)    | 48hr | No     | 1.38 (0.355 - 4.065)        | 2.68 (1.43 - 6.95)       | 0.232   |
| EV analysis         | CD284 (myeloid cells) | pre  | No     | 19.35 (10.46 - 25.325)      | 15.05 (9.305 - 29.665)   | 0.643   |
| EV analysis         | CD284 (myeloid cells) | icu  | No     | 17.32 (8.015 - 33.469)      | 15.37 (8.165 - 24.322)   | 0.751   |
| EV analysis         | CD284 (myeloid cells) | 6hr  | No     | 12.15 (5.035 - 19.92)       | 16.135 (7.94 - 26.913)   | 0.432   |
| EV analysis         | CD284 (myeloid cells) | 24hr | No     | 15.81 (4.845 - 35.127)      | 11.005 (5.055 - 18.722)  | 0.263   |
| EV analysis         | CD284 (myeloid cells) | 48hr | No     | 10.7 (1.81 - 19.53)         | 8.77 (5.05 - 15.43)      | 0.856   |
| EV analysis         | CD3 (T-cells)         | pre  | No     | 6.05 (3.235 - 13.698)       | 9.505 (4.883 - 16.29)    | 0.213   |
| EV analysis         | CD3 (T-cells)         | icu  | No     | 6.785 (3.845 - 11.373)      | 7.86 (6.568 - 10.957)    | 0.509   |
| EV analysis         | CD3 (T-cells)         | 6hr  | No     | 7.29 (4.065 - 10.495)       | 8.745 (5.738 - 13.37)    | 0.216   |
| EV analysis         | CD3 (T-cells)         | 24hr | No     | 8.93 (5.92 - 14.33)         | 8.57 (6.215 - 11.265)    | 0.614   |
| EV analysis         | CD3 (T-cells)         | 48hr | No     | 8.88 (4.9 - 15.445)         | 7.59 (5.46 - 10.73)      | 0.342   |
| EV analysis         | CD41 (platelets)      | pre  | No     | 0.355 (0.1 - 1.235)         | 0.135 (0.045 - 0.37)     | 0.023   |
| EV analysis         | CD41 (platelets)      | icu  | No     | 0.165 (0.07 - 0.723)        | 0.06 (0.04 - 0.19)       | 0.096   |
| EV analysis         | CD41 (platelets)      | 6hr  | No     | 0.11 (0.025 - 0.5)          | 0.06 (0.04 - 0.328)      | 0.643   |
| EV analysis         | CD41 (platelets)      | 24hr | No     | 0.11 (0.062 - 0.238)        | 0.05 (0.03 - 0.115)      | 0.032   |
| EV analysis         | CD41 (platelets)      | 48hr | No     | 0.06 (0.025 - 0.185)        | 0.05 (0.03 - 0.28)       | 0.791   |
| EV analysis         | CD62E (endothelial)   | pre  | No     | 2.22 (1.04 - 6.305)         | 2.72 (1.617 - 5.315)     | 0.278   |
| EV analysis         | CD62E (endothelial)   | icu  | No     | 3.13 (1.515 - 6.555)        | 4.27 (2.077 - 5.3)       | 0.813   |
| EV analysis         | CD62E (endothelial)   | 6hr  | No     | 3.27 (1.44 - 6.64)          | 4.26 (2.277 - 7.778)     | 0.402   |
| EV analysis         | CD62E (endothelial)   | 24hr | No     | 4 (1.45 - 5.96)             | 4.15 (2.13 - 4.985)      | 0.743   |
| EV analysis         | CD62E (endothelial)   | 48hr | No     | 3.65 (2.065 - 4.61)         | 4.05 (2.52 - 4.84)       | 0.76    |
| EV analysis         | EV concentration      | pre  | No     | 9.707 (4.696 - 21.838)      | 15.02 (4.863 - 24.41)    | 0.866   |
| EV analysis         | EV concentration      | icu  | No     | 10.533 (7.043 - 12.528)     | 8.937 (6.355 - 15.465)   | 0.719   |
| EV analysis         | EV concentration      | 6hr  | No     | 7.875 (2.694 - 16.305)      | 6.1 (2.732 - 13.237)     | 0.711   |
| EV analysis         | EV concentration      | 24hr | No     | 5.677 (3.363 - 11.437)      | 5.11 (3.367 - 10.08)     | 0.486   |
| EV analysis         | EV concentration      | 48hr | No     | 6.647 (3.498 - 15.153)      | 6.17 (3.04 - 8.16)       | 0.269   |
| miRNA               | hsa-miR-1262          | pre  | No     | 27.328 (0-1700.292)         | 0.509 (0-4883.161)       | 0.677   |
| miRNA               | hsa-miR-1262          | icu  | No     | 199.713 (14.878-167301.166) | 0.001 (0-4.311)          | 0.016   |
| miRNA               | hsa-miR-1262          | 24hr | No     | 4.294 (0.001-3327.722)      | 0 (0-299.063)            | 0.159   |
| miRNA               | hsa-miR-133b          | pre  | No     | 0.694 (0.005-19.664)        | 16.693 (0.063-25155.195) | 0.107   |
| miRNA               | hsa-miR-133b          | icu  | No     | 34.88 (1.629-26185.531)     | 423.669 (9.207-3857.218) | 0.647   |
| miRNA               | hsa-miR-133b          | 24hr | No     | 171.48 (6.089-2755.387)     | 114.52 (2.97-1387.016)   | 0.567   |
| miRNA               | hsa-miR-920           | pre  | No     | 0 (0-0)                     | 0 (0-0.001)              | 0.233   |
| miRNA               | hsa-miR-920           | icu  | No     | 0 (0-0)                     | 0 (0-0)                  | 0.204   |
| miRNA               | hsa-miR-920           | 24hr | No     | 0 (0-0)                     | 0 (0-0)                  | 0.524   |
| miRNA               | hsa-miR-92a-1         | pre  | No     | 0 (0-0.222)                 | 0.004 (0-0.052)          | 0.596   |
| miRNA               | hsa-miR-92a-1         | icu  | No     | 0.792 (0.024-22.092)        | 0.01 (0-149.256)         | 0.667   |
| miRNA               | hsa-miR-92a-1         | 24hr | No     | 1.136 (0-20.842)            | 0 (0-11.398)             | 0.173   |
| Multiplate analysis | ADP                   | pre  | Yes    | 665.25 (237.21)             | 753.222 (283.415)        | 0.207   |

eTable3

|                                |                              |             |           |                                                          |                                 |              |
|--------------------------------|------------------------------|-------------|-----------|----------------------------------------------------------|---------------------------------|--------------|
| Multiplate analysis            | ADP                          | icu         | No        | 427 (223.5 - 658)                                        | 548 (361 - 784)                 | 0.125        |
| <b>Multiplate analysis</b>     | <b>ADP</b>                   | <b>6hr</b>  | <b>No</b> | <b>552 (475.5 - 867.5)</b>                               | <b>817 (561 - 1002)</b>         | <b>0.025</b> |
| Multiplate analysis            | ADP                          | 24hr        | Yes       | 549.829 (222.828)                                        | 590.346 (265.239)               | 0.531        |
| Multiplate analysis            | ADP                          | 48hr        | No        | 362.5 (301.25 - 516)                                     | 399 (335.25 - 602.5)            | 0.336        |
| Multiplate analysis            | ASPI                         | pre         | No        | 323 (165.5 - 772.5)                                      | 286 (114.5 - 465.5)             | 0.249        |
| Multiplate analysis            | ASPI                         | icu         | No        | 251 (149 - 619.5)                                        | 232 (137 - 493)                 | 0.599        |
| Multiplate analysis            | ASPI                         | 6hr         | No        | 445 (198.5 - 623.5)                                      | 365 (265 - 702)                 | 0.826        |
| Multiplate analysis            | ASPI                         | 24hr        | No        | 310 (234 - 627)                                          | 342 (265.25 - 455.75)           | 0.983        |
| Multiplate analysis            | ASPI                         | 48hr        | No        | 223.5 (146.75 - 348.5)                                   | 225 (185.25 - 381.5)            | 0.475        |
| Multiplate analysis            | TRAP                         | pre         | Yes       | 1158.656 (350.609)                                       | 1235.407 (324.391)              | 0.387        |
| Multiplate analysis            | TRAP                         | icu         | Yes       | 1060.548 (535.746)                                       | 1115.552 (423.282)              | 0.66         |
| Multiplate analysis            | TRAP                         | 6hr         | Yes       | 1247.692 (392.467)                                       | 1331.424 (302.441)              | 0.311        |
| Multiplate analysis            | TRAP                         | 24hr        | Yes       | 952.829 (273.392)                                        | 842.2 (362.364)                 | 0.205        |
| Multiplate analysis            | TRAP                         | 48hr        | No        | 673.5 (562.5 - 792.25)                                   | 640 (504 - 846.25)              | 0.628        |
| Flow cytometry analysis        | Activated GPIIb/IIIa (PAC-1) | pre         | Yes       | 52.078 (29.695)                                          | 56.848 (26.03)                  | 0.565        |
| Flow cytometry analysis        | Activated GPIIb/IIIa (PAC-1) | icu         | No        | 45.84 (19.698 - 73.232)                                  | 33.74 (16.72 - 51.78)           | 0.293        |
| Flow cytometry analysis        | Activated GPIIb/IIIa (PAC-1) | 6hr         | No        | 48.04 (18.43 - 60.562)                                   | 26.78 (17.433 - 44.772)         | 0.104        |
| Flow cytometry analysis        | Activated GPIIb/IIIa (PAC-1) | 24hr        | No        | 50.28 (29.513 - 80.073)                                  | 47.01 (34.18 - 56.56)           | 0.71         |
| Flow cytometry analysis        | Activated GPIIb/IIIa (PAC-1) | 48hr        | No        | 40.525 (25.315 - 85.828)                                 | 43.965 (31.363 - 66.2)          | 1            |
| Flow cytometry analysis        | CD11b                        | pre         | No        | 3.715 (0.603 - 17.413)                                   | 2.39 (0.6 - 4.685)              | 0.582        |
| Flow cytometry analysis        | CD11b                        | icu         | No        | 11.485 (0.34 - 29.6)                                     | 9.46 (0.908 - 22.192)           | 0.774        |
| Flow cytometry analysis        | CD11b                        | 6hr         | No        | 1.76 (0.63 - 19.055)                                     | 4.775 (0.727 - 13.085)          | 0.864        |
| Flow cytometry analysis        | CD11b                        | 24hr        | No        | 6.31 (1.31 - 9.735)                                      | 2.51 (1.145 - 12.055)           | 0.808        |
| Flow cytometry analysis        | CD11b                        | 48hr        | No        | 3.8 (0.865 - 13.372)                                     | 2.335 (0.672 - 3.99)            | 0.799        |
| Flow cytometry analysis        | CD14/CD41                    | pre         | No        | 7.245 (6.036 - 9.147)                                    | 6.35 (4.968 - 7.68)             | 0.18         |
| Flow cytometry analysis        | CD14/CD41                    | icu         | No        | 4.269 (2.593 - 5.883)                                    | 3.35 (1.15 - 5.853)             | 0.434        |
| Flow cytometry analysis        | CD14/CD41                    | 6hr         | No        | 9.56 (2.703 - 15.674)                                    | 5.5 (1.362 - 11.865)            | 0.294        |
| Flow cytometry analysis        | CD14/CD41                    | 24hr        | No        | 7.764 (4.47 - 14.972)                                    | 5.717 (2.191 - 12.03)           | 0.32         |
| Flow cytometry analysis        | CD14/CD41                    | 48hr        | No        | 7.852 (2.27 - 9.811)                                     | 6.265 (2.995 - 15.774)          | 0.727        |
| <b>Flow cytometry analysis</b> | <b>CD16/CD41</b>             | <b>pre</b>  | <b>No</b> | <b>42.801 (20.605 - 52.947)</b>                          | <b>11.936 (2.44 - 39.315)</b>   | <b>0.003</b> |
| Flow cytometry analysis        | CD16/CD41                    | icu         | No        | 21.366 (4.58 - 39.51)                                    | 7.872 (1.689 - 26.794)          | 0.227        |
| <b>Flow cytometry analysis</b> | <b>CD16/CD41</b>             | <b>6hr</b>  | <b>No</b> | <b>19.569 (8.271 - 48.52)</b>                            | <b>4.781 (1.158 - 13.887)</b>   | <b>0.014</b> |
| Flow cytometry analysis        | CD16/CD41                    | 24hr        | No        | 27.988 (10.389 - 38.298)                                 | 12.24 (2.051 - 30.151)          | 0.155        |
| Flow cytometry analysis        | CD16/CD41                    | 48hr        | No        | 30.452 (16.12 - 47.194)                                  | 23.408 (3.642 - 46.02)          | 0.357        |
| Flow cytometry analysis        | CD41/CD62P                   | pre         | No        | 11.77 (8.123 - 24.302)                                   | 13.365 (9.012 - 18.95)          | 0.801        |
| Flow cytometry analysis        | CD41/CD62P                   | icu         | No        | 11.46 (8.515 - 18.23)                                    | 10.02 (4.615 - 13.89)           | 0.17         |
| Flow cytometry analysis        | CD41/CD62P                   | 6hr         | No        | 10.925 (8.512 - 16.135)                                  | 10.62 (7.01 - 13.355)           | 0.504        |
| Flow cytometry analysis        | CD41/CD62P                   | 24hr        | No        | 12.34 (8.54 - 14.73)                                     | 10.11 (7.38 - 14.27)            | 0.741        |
| Flow cytometry analysis        | CD41/CD62P                   | 48hr        | No        | 12.34 (8.765 - 18.7)                                     | 10.23 (4.69 - 16.22)            | 0.316        |
| Flow cytometry analysis        | CD64/CD163                   | pre         | No        | 7.238 (5.795 - 10.135)                                   | 6.77 (5.684 - 8.748)            | 0.493        |
| Flow cytometry analysis        | CD64/CD163                   | icu         | No        | 5.359 (3.463 - 15.035)                                   | 7.614 (1.892 - 12.404)          | 0.745        |
| Flow cytometry analysis        | CD64/CD163                   | 6hr         | No        | 14.89 (7.224 - 34.879)                                   | 10.085 (4.702 - 20.658)         | 0.218        |
| Flow cytometry analysis        | CD64/CD163                   | 24hr        | No        | 15.659 (6.395 - 24.184)                                  | 8.527 (4.57 - 16.269)           | 0.238        |
| Flow cytometry analysis        | CD64/CD163                   | 48hr        | No        | 17.861 (7.676 - 29.341)                                  | 9.416 (6.618 - 21.383)          | 0.53         |
| Circulating biomarkers         | CXCL1                        | pre         | No        | 3.744 (2.318 - 10.585)                                   | 3.199 (2.318 - 6.647)           | 0.269        |
| Circulating biomarkers         | CXCL1                        | icu         | No        | 11.112 (2.615 - 34.176)                                  | 6.712 (3.332 - 13.968)          | 0.244        |
| Circulating biomarkers         | CXCL1                        | 6hr         | No        | 6.567 (2.318 - 15.784)                                   | 4.911 (2.318 - 9.637)           | 0.313        |
| Circulating biomarkers         | CXCL1                        | 24hr        | No        | 5.727 (2.318 - 15.051)                                   | 2.318 (2.318 - 6.65)            | 0.266        |
| Circulating biomarkers         | CXCL1                        | 48hr        | No        | 2.768 (2.318 - 17.557)                                   | 2.349 (2.318 - 6.65)            | 0.475        |
| Circulating biomarkers         | ICAM1                        | pre         | No        | 1308557.275 (839981.001 - 1732249.1461197292.905)        | 543823.482 - 1532129.496        | 0.269        |
| Circulating biomarkers         | ICAM1                        | icu         | No        | 1497879.046 (647305.841 - 2084625.5611095508.272)        | 806047.016 - 1643080.197        | 0.425        |
| Circulating biomarkers         | ICAM1                        | 6hr         | No        | 1298714.983 (829995.511 - 2210903.8461304970.189)        | 813370.504 - 2149794.037        | 0.921        |
| Circulating biomarkers         | ICAM1                        | 24hr        | No        | 1654346.776 (779856.163 - 2549254.1861465262.722)        | 852929.49 - 2208904.562         | 0.845        |
| <b>Circulating biomarkers</b>  | <b>ICAM1</b>                 | <b>48hr</b> | <b>No</b> | <b>1750900.171 (1052195.998 - 3057463.001115578.167)</b> | <b>784847.679 - 1668053.479</b> | <b>0.035</b> |
| Circulating biomarkers         | IL10                         | pre         | No        | 0.06 (0.06 - 0.922)                                      | 0.481 (0.06 - 1.074)            | 0.553        |
| Circulating biomarkers         | IL10                         | icu         | No        | 23.207 (9.614 - 35.575)                                  | 36.22 (10.347 - 58.5)           | 0.157        |
| Circulating biomarkers         | IL10                         | 6hr         | No        | 8.049 (3.017 - 21.394)                                   | 6.421 (2.395 - 17.51)           | 0.803        |
| Circulating biomarkers         | IL10                         | 24hr        | No        | 5.028 (1.53 - 7.69)                                      | 2.365 (0.472 - 6.31)            | 0.197        |
| Circulating biomarkers         | IL10                         | 48hr        | No        | 1.548 (0.528 - 3.195)                                    | 1.026 (0.06 - 2.627)            | 0.319        |
| Circulating biomarkers         | IL6                          | pre         | No        | 0.52 (0.52 - 0.521)                                      | 0.52 (0.52 - 0.52)              | 0.712        |
| Circulating biomarkers         | IL6                          | icu         | No        | 52.094 (21.971 - 129.317)                                | 43.429 (26.151 - 85.071)        | 0.681        |
| Circulating biomarkers         | IL6                          | 6hr         | No        | 46.908 (19.698 - 85.864)                                 | 52.963 (21.065 - 60.958)        | 0.825        |
| Circulating biomarkers         | IL6                          | 24hr        | No        | 46.319 (12.592 - 74.567)                                 | 27.611 (18.354 - 45.902)        | 0.38         |
| Circulating biomarkers         | IL6                          | 48hr        | No        | 29.903 (16.168 - 64.577)                                 | 30.337 (14.471 - 74.294)        | 0.779        |
| Circulating biomarkers         | IL8                          | pre         | No        | 0.003 (0.003 - 0.386)                                    | 0.003 (0.003 - 0.807)           | 0.662        |
| Circulating biomarkers         | IL8                          | icu         | No        | 2.839 (1.252 - 8.194)                                    | 5.291 (1.19 - 7.24)             | 0.656        |
| Circulating biomarkers         | IL8                          | 6hr         | No        | 3.552 (1.397 - 5.67)                                     | 3.79 (2.095 - 6.285)            | 0.693        |
| Circulating biomarkers         | IL8                          | 24hr        | No        | 2.003 (0.442 - 3.646)                                    | 1.83 (0.416 - 3.449)            | 0.797        |
| Circulating biomarkers         | IL8                          | 48hr        | No        | 1.326 (0.112 - 3.035)                                    | 1.326 (0.386 - 2.265)           | 0.628        |
